# Supplementary material for: Longitudinal Comparison of Neutralizing Antibody Responses to COVID-19 mRNA Vaccines after Second and Third Doses
Source: MDPI journal article supplement (doi:10.3390/vaccines10091459), 2022-09-03
Supplement: s1 [file s1]

## Supplementary Appendix

The supplementary appendix has been provided by authors to give readers additional information about the work. Supplement to: Roeder A.J., Koehler M.A., Lake D.F., *et al.* Longitudinal Comparison of Neutralizing Antibody Responses to COVID-19 mRNA Vaccines after Second and Third Doses.

Supplementary Figure S1 is provided to help orient readers with respect to conversion between units described in the main text, such as NAb LFA test line density, percent neutralization, and NAb titer.

| NAb LFA Test Image                  |  |  |  |  |  |  |
|-------------------------------------|-----------------------------------------------------------------------------------|-----------------------------------------------------------------------------------|-----------------------------------------------------------------------------------|------------------------------------------------------------------------------------|-------------------------------------------------------------------------------------|-------------------------------------------------------------------------------------|
| Test Line Density Units (thousands) | 10-99                                                                             | 100-199                                                                           | 200-369                                                                           | 370-599                                                                            | 600-799                                                                             | 800-1000                                                                            |
| Neutralization (%)                  | 99-90                                                                             | 89-80                                                                             | 79-61                                                                             | 60-36                                                                              | 35-15                                                                               | ≤15                                                                                 |
| NAb Titer Ranges                    | <1:1280<br>≥1:640                                                                 | <1:640<br>≥1:320                                                                  | <1:320<br>≥1:160                                                                  | <1:160<br>≥1:80                                                                    | <1:80<br>≥1:40                                                                      | ≤1:40                                                                               |

**Supplementary Figure S1.** Neutralizing antibody later flow assay (NAb LFA) measured in density units corresponds to percent neutralization and NAb titer. Validation of the rapid NAb test using gold standard focus reduction neutralization test (FRNT<sub>50</sub>) with authentic SARS-CoV-2 Wuhan isolate and correlation/regression analyses are previously described [17]. Percent neutralization was calculated as 1-Test line density/Limit of Detection (942,481) \*100%. Titers are based on the last dilution of a serum sample that inhibited 50% of infectious foci in a Focus Reduction Neutralization test [17, 18].

Supplementary Figure S2 demonstrates annexation of sample size with respect to dose and vaccine manufacturer. This flowchart is provided for clarity of sample sizes discussed throughout the manuscript. Figures 3B and 3C in the main text reference “mixed” and “non-mixed” 3<sup>rd</sup> vaccine doses.

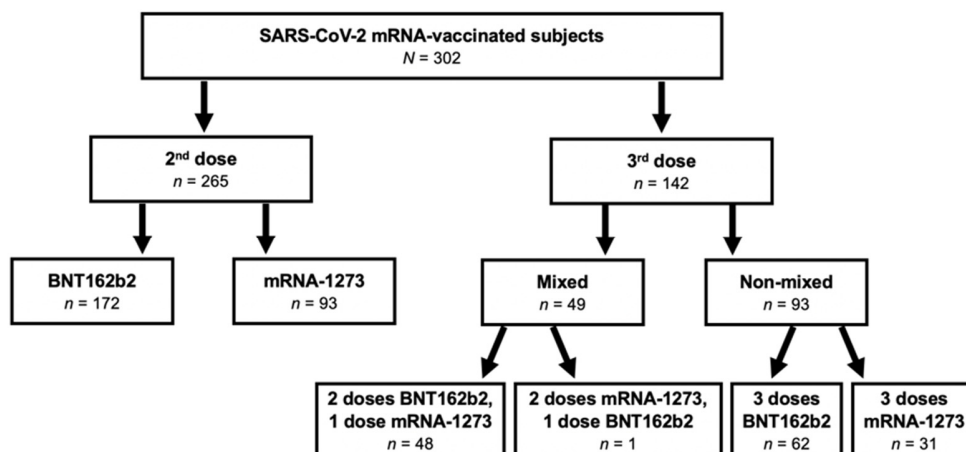

**Supplementary Figure S2.** Flowchart of mRNA-vaccinated subjects with respect to dose and vaccine manufacturer. Sample sizes for the second dose group are divided into BNT162b2 and mRNA-1273 recipients. The third dose group is first divided into mixed and non-mixed vaccine recipients, and subsequently by number of doses per vaccine manufacturer.

Supplementary Figure S3 shows longitudinal analysis of NAb titers with respect to sex, age, and sex/age concurrently using unpaired 2<sup>nd</sup> and 3<sup>rd</sup> dose data sets.

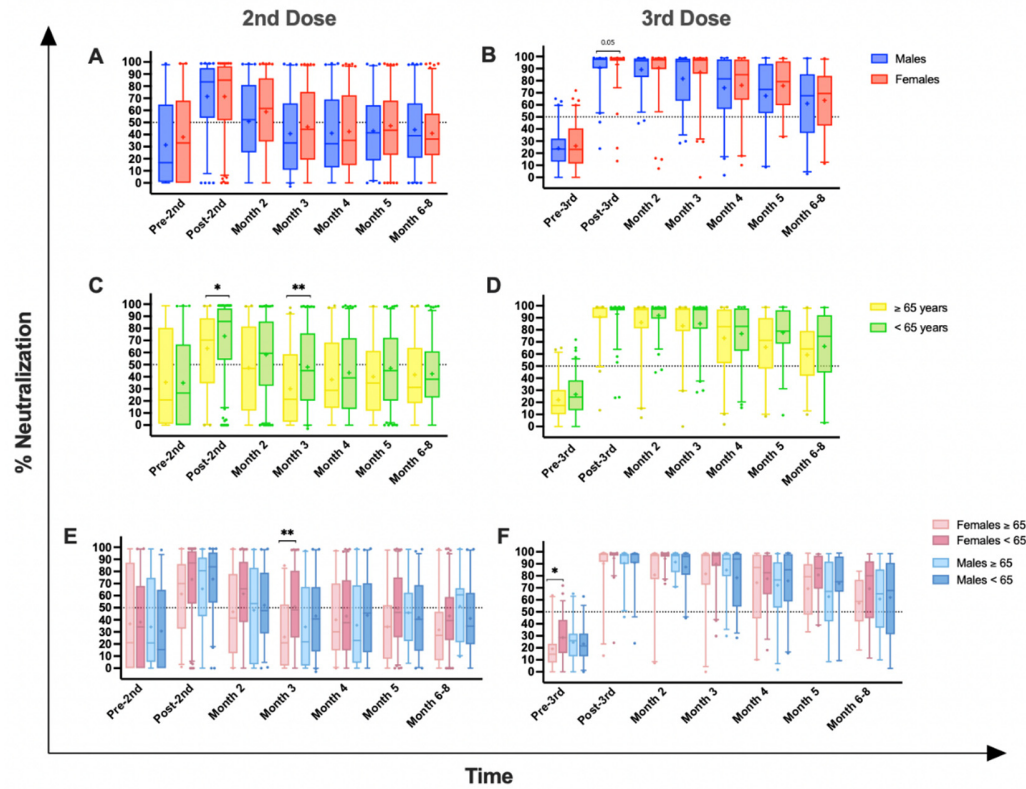

**Supplementary Figure S3.** Comparison of Second and Third Dose NAb Durability by Sex and Age. Graphs are grouped by column and row. Graphs in the left column represent 2<sup>nd</sup> dose data, grouped by sex (top row), age ( $\geq$  or  $<$  65 years old, middle row), and combined sex and age analyses (bottom row). Graphs in the right column demonstrate 3<sup>rd</sup> dose data, grouped by row as detailed previously. **A)** Evaluation of sex-based differences after 2<sup>nd</sup> dose, and **B)** after 3<sup>rd</sup> dose. **C)** Evaluation of age-based differences after 2<sup>nd</sup> dose, and **D)** after 3<sup>rd</sup> dose. **E)** Evaluation of sex and age combined differences after 2<sup>nd</sup> dose, and **F)** after 3<sup>rd</sup> dose. Data are shown as grouped box and whisker plots with error bars representing 5<sup>th</sup>-95<sup>th</sup> percentile of each population. Outliers outside of the 5<sup>th</sup>-95<sup>th</sup> percentile are shown as circular symbols above or below error bars. Data corresponding to graphs in top and middle rows were analyzed using non-parametric Mann-Whitney test to evaluate mean rank between groups with a two-tailed P-value ( $p < 0.05$ ) and 95% confidence interval (CI). Bottom row graphs were generated from data analyzed using a non-parametric Kruskal-Wallis test to evaluate mean rank between groups using multiple comparisons (two-tailed  $p < 0.05$  and 95% CI). Axes are labeled as time (X) and percent neutralization (Y). Pre- and post-vaccine dose timepoints are defined in the (see Figure 3 legend).

Supplementary Figure S4 demonstrates a post hoc power analysis of paired longitudinal 2<sup>nd</sup> and 3<sup>rd</sup> dose vaccination data, provided in reference to Figure 6 in the main text.

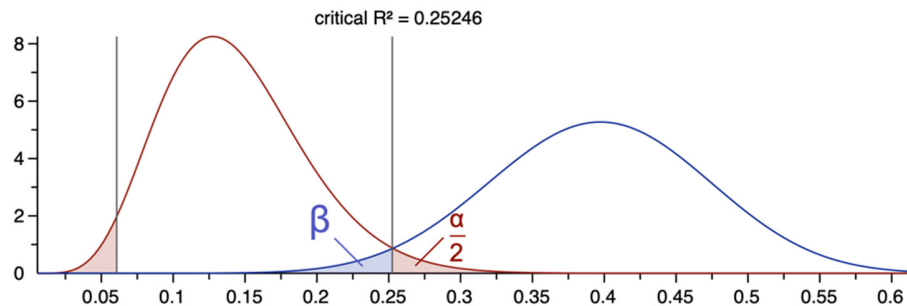

**Supplementary Figure S4.** Post hoc power analysis of paired longitudinal data set to compute achieved power given  $\alpha$  (0.05), sample size ( $N = 105$ ) and effect size ( $R^2 = 0.3$ ). Statistic calculated for two-tailed, random-model linear multiple regression (exact test) with 14 predictors: power ( $1 - \beta$ ) = 0.974.

Supplementary Figure S5 demonstrates NAb titers prior to breakthrough infection in a population infected prior to the emergence of the SARS-CoV-2 Omicron variant (Delta variant or earlier), compared to a population infected during the Omicron wave.

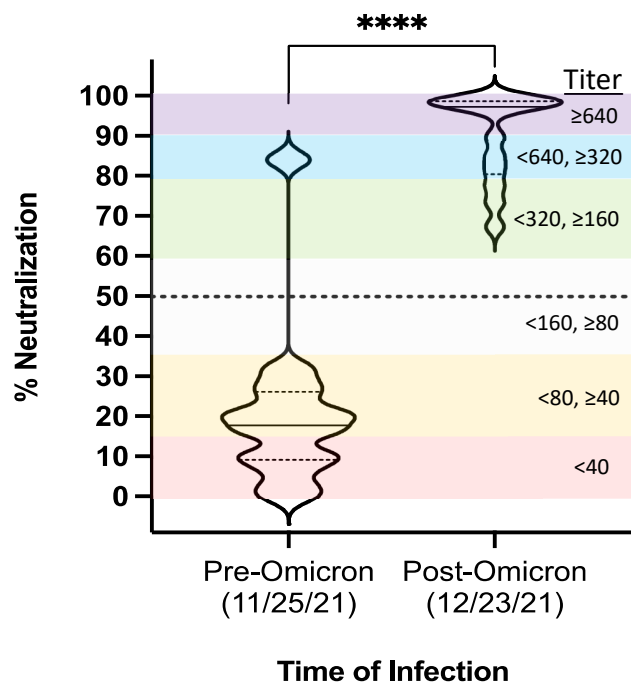

**Supplementary Figure S5.** NAb titers prior to breakthrough infection in groups infected before and after the onset of Omicron community spread. NAb data prior to infection are shown as percent neutralization violin plots where solid black lines represent median, and dotted black lines indicate upper and lower quartiles. A single outlier in the pre-December 2021 group had 84% neutralization prior to infection, however, was on the 2<sup>nd</sup> week of a 40 mg/day prednisone taper at the time of infection. Demographic information pertaining to individuals in both groups are detailed in Supplementary Table S1.

Supplementary Table S1 A and B are provided in reference to Figure 7 in the main text, to give readers additional information regarding the time between vaccination, NAb testing, and confirmed breakthrough infection.

| A | Age   | Sex | 1 <sup>st</sup> /2 <sup>nd</sup> Dose mRNA Vaccine | 3rd Dose mRNA Vaccine | Date of 3rd Dose | Pre-Infection NAb Test | Pre- Infection % Neut. (NAb Titer) | Date of PCR+ | NAb Test to PCR+ (days) |
|---|-------|-----|----------------------------------------------------|-----------------------|------------------|------------------------|------------------------------------|--------------|-------------------------|
|   |       |     |                                                    |                       |                  |                        |                                    |              |                         |
|   | 31-35 | M   | mRNA-1273                                          | mRNA-1273             | Nov-2021         | Dec-2021               | 98.9 (>1:640)                      | Jan-2022     | 26                      |
|   | 61-65 | F   | BNT162b2                                           | BNT162b2              | Oct-2021         | Dec-2021               | 98.8 (>1:640)                      | Dec-2021     | 19                      |
|   | 56-60 | F   | BNT162b2                                           | BNT162b2              | Oct-2021         | Jan-2022               | 98.8 (>1:640)                      | Jan-2022     | 17                      |
|   | 46-50 | F   | BNT162b2                                           | mRNA-1273             | Sep-2021         | Dec-2021               | 98.5 (>1:640)                      | Jan-2022     | 34                      |
|   | 51-55 | F   | BNT162b2                                           | mRNA-1273             | Oct-2021         | Dec-2021               | 98.5 (>1:640)                      | Jan-2022     | 27                      |
|   | 51-55 | F   | BNT162b2                                           | BNT162b2              | Oct-2021         | Dec-2021               | 98.4 (>1:640)                      | Jan-2022     | 20                      |
|   | 36-40 | F   | BNT162b2                                           | mRNA-1273             | Nov-2021         | Nov-2021               | 97.4 (>1:640)                      | Jan-2022     | 60                      |
|   | 46-50 | M   | BNT162b2                                           | mRNA-1273             | Aug-2021         | Nov-2021               | 96.9 (>1:640)                      | Jan-2022     | 34                      |
|   | 46-50 | M   | BNT162b2                                           | BNT162b2              | Oct-2021         | Dec-2021               | 89.7 (>1:640)                      | Jan-2022     | 27                      |
|   | 41-45 | F   | BNT162b2                                           | BNT162b2              | Oct-2021         | Dec-2021               | 85.0 (>1:320)                      | Jan-2022     | 25                      |
|   | 66-70 | M   | mRNA-1273                                          | mRNA-1273             | Oct-2021         | Dec-2021               | 81.6 (>1:320)                      | Jan-2022     | 30                      |
|   | 61-65 | M   | BNT162b2                                           | BNT162b2              | Aug-2021         | Dec-2021               | 77.6 (>1:160)                      | Dec-2021     | 18                      |
|   | 41-45 | F   | BNT162b2                                           | BNT162b2              | Oct-2021         | Dec-2021               | 73.4 (>1:160)                      | Jan-2022     | 24                      |
|   | 36-40 | F   | mRNA-1273                                          | mRNA-1273             | Sep-2021         | Jan-2022               | 67.4 (>1:160)                      | Jan-2022     | 6                       |

  

| B | Age   | Sex | 1 <sup>st</sup> /2 <sup>nd</sup> Dose mRNA Vaccine | Date of 2nd Dose | Pre-Infection NAb Test | Pre-Infection % Neut. (NAb Titer) | Date of PCR+ | NAb Test to PCR+ (days) |
|---|-------|-----|----------------------------------------------------|------------------|------------------------|-----------------------------------|--------------|-------------------------|
|   |       |     |                                                    |                  |                        |                                   |              |                         |
|   | 46-50 | M   | BNT162b2                                           | Mar-2021         | Sep-2021               | 84.2 (>1:320)                     | Sep-2021     | 8                       |
|   | 31-35 | M   | BNT162b2                                           | Jan-2021         | Apr-2021               | 32.3 (<1:80)                      | Oct-2021     | 187                     |
|   | 26-30 | F   | BNT162b2                                           | Jan-2021         | Jul-2021               | 28.5 (<1:80)                      | Aug-2021     | 18                      |
|   | 61-65 | M   | BNT162b2                                           | Jan-2021         | Aug-2021               | 25.6 (<1:80)                      | Sep-2021     | 20                      |
|   | 76-80 | F   | BNT162b2                                           | Jan-2021         | May-2021               | 21.3 (<1:80)                      | Jul-2021     | 61                      |
|   | 31-35 | F   | mRNA-1273                                          | Mar-2021         | Sep-2021               | 20.8 (<1:80)                      | Nov-2021     | 40                      |
|   | 51-55 | M   | BNT162b2                                           | Feb-2021         | Sep-2021               | 19.4 (<1:80)                      | Sep-2021     | 8                       |
|   | 51-55 | F   | mRNA-1273                                          | Feb-2021         | Aug-2021               | 16.6 (<1:80)                      | Sep-2021     | 21                      |
|   | 76-80 | M   | BNT162b2                                           | Feb-2021         | May-2021               | 16.3 (<1:80)                      | Jul-2021     | 53                      |
|   | 51-55 | F   | mRNA-1273                                          | Feb-2021         | Sep-2021               | 10.8 (<1:40)                      | Nov-2021     | 69                      |
|   | 56-60 | M   | BNT162b2                                           | Feb-2021         | Oct-2021               | 10.1 (<1:40)                      | Oct-2021     | 3                       |
|   | 81-85 | F   | BNT162b2                                           | Feb-2021         | Sep-2021               | 7.3 (<1:40)                       | Oct-2021     | 23                      |
|   | 46-50 | F   | BNT162b2                                           | Feb-2021         | Oct-2021               | 2.9 (<1:40)                       | Nov-2021     | 43                      |
|   | 41-45 | F   | BNT162b2                                           | Mar-2021         | Aug-2021               | 0.0 (<1:40)                       | Sep-2021     | 17                      |

**Supplementary Table S1.** Breakthrough infection population demographics. **(A)** Pre-Omicron and **(B)** Post-Omicron population demographics, vaccination status, and NAb result preceding infection. Age, sex, 1<sup>st</sup>/2<sup>nd</sup> vaccine dose and date, 3<sup>rd</sup> dose vaccine and date (if applicable), date of last NAb test prior to infection, pre-infection NAb result, date of positive PCR for SARS-CoV-2 detection, and days between NAb and PCR dates are detailed in these tables. Pre-infection NAb test result is shown as % neutralization, calculated using the limit of detection our rapid NAb lateral flow as described previously Average age of the pre- and post-

December 2021 populations were 54 and 49 (median 55 and 49.5), respectively. Populations in (A) and (B) were 57% and 64% female, respectively.
